1 **Pyrethroid and metal residues in different coffee bean preparing processes and their**  
2 **human health risk assessments via consumption**

3

4 Paphatsara Khunlert<sup>1</sup>, Phanwimol Tanhan<sup>1</sup>, Amnart Poapolathep<sup>1</sup>, Saranya Poapolathep<sup>1</sup> &  
5 Kanjana Imsilp<sup>1\*</sup>

6

7 <sup>1</sup> Department of Pharmacology, Faculty of Veterinary Medicine, Kasetsart University,  
8 Bangkok, Thailand

9

10 \*Corresponding author

11 email address [fvetkni@ku.ac.th](mailto:fvetkni@ku.ac.th) (KI)

12

13 **Abstract**

14 The study was conducted on 50 samples of coffee beans from various origins. The  
15 samples included green coffee beans, roasted beans, brew coffee drinks and coffee sludge.  
16 Three processes were used to prepare these samples: dried, semi-washed, and washed. Three  
17 synthetic pyrethroid insecticides and nine heavy metals were subsequently analyzed using  
18 modified Quick, Easy, Cheap, Effective, Rugged and Safe (QuEChERS) and acid digestion  
19 methods, respectively. The quantification of pyrethroids was performed by GC- $\mu$ ECD whereas  
20 those of metals were determined using flame atomic absorption spectrophotometer. According  
21 to the results, concentrations of both pyrethroids and heavy metals were predominantly found  
22 in green coffee beans except for Cr. Pyrethroid insecticides were not detectable in brew coffee  
23 drink and heavy metal concentrations were below the acceptable daily intake (ADI) level. Risk  
24 estimations for daily coffee intake using the health risk indices (HRIs) and target hazard  
25 quotients (THQs) of normal and the 97.5 percentile Thai consumers were less than 1. This

26 indicated that the coffee drinks from studied samples could not cause potential health risk.

27

28 **Keywords:** coffee; consumption; health risk; heavy metals; pyrethroid

29

## 30 **Introduction**

31 Coffee is a worldwide favorite beverage. It has several beneficial antioxidants and is  
32 one among the richest chlorogenic acid sources (1). However, coffee drinking can potentially  
33 lead human to expose to multiple toxicants. Those of which include pesticides, heavy metals,  
34 organic solvents and pharmaceutical agents. These hazardous chemicals have abundantly been  
35 used to protect coffee trees from pests and diseases during cultivation and manufacturing  
36 processes (2). Even though coffee beans are roasted, pesticide residues are still present. Recent  
37 studies revealed that coffee beans and coffee wastes were contaminated by numerous pesticides  
38 and metals (3-5).

39 Applications of pesticides and insecticides to coffee crops are either directly to soil or  
40 to aerial parts of the plants (6). Chemical classes generally used are organophosphates,  
41 pyrethroids, carbamates, chlorinated cyclodienes and organotins (6). The most favorite class  
42 among those are pyrethroids and accounted for one fifth of total insecticide global market (7,  
43 8). They are synthetic analogues of pyrethrin found in *Tanacetum cinerariaefolium*  
44 (Asteraceae) or pyrethrum daisy. Pyrethroids have extensively been used in agricultural crops  
45 as well as in animals to reduce pests and decrease their transfers which can help improving the  
46 coffee yield. Pyrethroids commonly used in coffee culture are cypermethrin, esfenvaleratem  
47 fenpropathrin, permethrin and cyfluthrin (9). Human can be exposed to these pyrethroids via  
48 inhalation, dermal contact, and ingestion (the major route) (10). The exposure can deteriorate  
49 human health. Even though harmful health effects following coffee consumption are likely,  
50 data are still limited.

51 Another group of toxicants that can be found in coffee beans is metals. They are  
52 naturally occurred or resulted from anthropogenic activities. The metals, either trace or toxic,  
53 have widely been dispersed in the environment and entered food chains at different  
54 concentrations. Coffee plants can absorb these metals through their roots and translocate them  
55 into the shoots as well as grains. Grains or beans usually accumulate metals at lower  
56 concentration than other parts. However, lifetime consumption of contaminated beans may  
57 pose adverse effects on human health. Coffee drinks commonly contain essential elements  
58 such as copper (Cu), manganese (Mn) and iron (Fe) at low concentrations. However, the  
59 essential [e.g., Cu, chromium (Cr), Mn, nickel (Ni), zinc (Zn)] and toxic [e.g., arsenic (As),  
60 cadmium (Cd), lead (Pb), cobalt (Co)] elements can be harmful if their levels exceed human  
61 tolerable limits.

62 Commonly, coffee is traded as green coffee beans prepared by either dry or washed  
63 processes. Both processes have similar steps from cleaning, separation, drying, storage,  
64 processing to classification. The differences are that, in the dry process, coffee fruits are sun  
65 dried followed by mechanical removal of dried husk whereas in the washed process, the  
66 damage and unripe coffee fruits are separated from the ripe ones by floatation technique. The  
67 skin and pulp in washed process were mechanically removed by pressing coffee fruits into  
68 water through metal sieve. Another method containing fewer steps is a semi-washed process.  
69 In this process, the outer skins are mechanically removed, and coffee beans are washed then  
70 dried. The quality of coffee beans in washed process generally scores higher than dried process  
71 coffee. This is because washed coffee beans have a higher percentage of ripe fruit harvested,  
72 while dry coffee beans have a wider range of ripeness from unripe to overripe. These also  
73 resulted in measurably different effects of sugar and flavor precursors present (11).

74 Several studies reported the contents of elements including heavy metals in green (raw)  
75 and roasted coffee varieties in different parts of the world (12) using a variety of techniques.

76 The elements present in the roasted and ground coffee samples and their infusions can differ  
77 (9, 13). In addition, brewing types and roasting conditions also affected the concentration of  
78 elements in resulting infusions (14, 15). de Queiroz, Azevedo (9) determined heavy metals  
79 (Cd, Cr, Cu, Mn, Ni, Pb, Zn) in the roasted and ground coffee beans and brew. They reported  
80 that for all the infusions, the metals evaluated were found in lower concentrations with respect  
81 to the maximum permissible daily intake, except for Pb. Hence, it is important to determine  
82 heavy metal concentrations in various forms of coffee (raw, roasted, brew).

83 To the best of our knowledge, no research study has been conducted for analyzing the  
84 heavy metals and pyrethroid insecticides in green coffee beans, roasted coffee, and brew in  
85 Thailand. Therefore, the main goals of this study were 1) to determine the residues of  
86 pyrethroid insecticides (flumethrin, cypermethrin, and cyfluthrin) and heavy metals (Cd, Co,  
87 Cr, Cu, Fe, Mn, Ni, Pb, and Zn) in various forms of coffee (green, roasted, brew, sludge)  
88 originated from green coffee beans prepared by 3 processes (dry, semi-washed, washed); 2) to  
89 evaluate the human health risk from insecticide and metal contaminated coffee drink using the  
90 estimate daily intake/EDI, health risk index/HRI, and target hazard quotients/THQs. The  
91 results of this study would provide useful baseline data on the levels of contaminants and  
92 human health risks through coffee consumption.

## 93 **Materials and Methods**

### 94 **Chemicals and reagents**

95 All chemicals and reagents used in this study were  $\geq 99\%$  purity analytical or pesticide  
96 grades. Acetonitrile, ethyl acetate, acetic acid and nitric acid were purchased from RCI  
97 Labscan, Ltd., Thailand. Magnesium sulfate anhydrous ( $\text{MgSO}_4$ ; 98.0%), sodium chloride  
98 ( $\text{NaCl}$ ), sodium acetate anhydrous ( $\text{C}_2\text{H}_3\text{NaO}_2$ ), tri-sodium citrate dihydrate ( $\text{C}_6\text{H}_9\text{Na}_3\text{O}_9$ ),  
99 sodium citrate anhydrate ( $\text{C}_6\text{H}_5\text{Na}_3\text{O}_7$ ) and alumina were purchased from Sigma-Aldrich, USA.  
100 Solid phase extractants including primary secondary amine (PSA) and octadecyl carbon ( $\text{C}_{18}$ )

101 were purchased from Agela Technologies, China and Macherey-Nagel, USA, respectively.  
102 Pyrethroid insecticide standards including cyfluthrin (4 isomers), flumethrin and cypermethrin  
103 (4 isomers) and individual metal standard solutions (Cd, Co, Cr, Cu, Fe, Mn, Ni, Pb and Zn;  
104 1000 mg/L each) were purchased from Supelco<sup>®</sup> Sigma-Aldrich, USA.

### 105 **Sample collection and preparation**

106 Fifty 1-kg green coffee bean samples were randomly purchased from local markets in  
107 Bangkok, Thailand. They were from Asia, North America, South America, and South Africa. All  
108 samples were divided by their preparation processes into three groups; i.e., dried, semi-washed, and  
109 washed (Table 1). Each sample was aliquoted into two equal sub-samples. One sub-sample was  
110 ground and homogenized with miller and served as green coffee bean samples. Another sub-sample  
111 was roasted at 230°C until it presented the aroma (3). The roasted beans were ground into fine  
112 powder with a blender and 10 g were collected and added with 180 mL hot water (96°C). The brew  
113 coffee drink was then collected using paper drip technique. Coffee sludge remained in the filtered  
114 paper was also collected and oven dried at 65°C before storage. Green coffee beans from organic  
115 cultivation in Thailand were used as a blank and for spiked samples. They were prepared using  
116 similar processes as those of the samples. All samples were kept at -20°C until chemical analysis.

### 117 **Sample extraction and clean-up**

#### 118 **Pyrethroid residues**

119 To assess the differences in pyrethroid insecticide residues among coffee bean  
120 processes, the extraction and clean-up of green coffee beans and processed coffee samples  
121 (roasted coffee powder, brew coffee drink and coffee sludge) were conducted using modified  
122 Quick, Easy, Cheap, Effective, Rugged and Safe (QuEChERS) method combined with  
123 dispersive solid phase extraction (d-SPE) clean-up method. The extraction and clean-up  
124 procedures for green coffee beans and processed coffee samples were as follows:

125 *Green coffee beans and brew coffee drink:* 2.5 g green coffee beans or 10 mL brew coffee

126 drink were added with 10 mL acetonitrile, and hand shaken for 1 min. The samples were then added  
127 with 4 g MgSO<sub>4</sub> and 1.5 g C<sub>2</sub>H<sub>3</sub>NaO<sub>2</sub>, and shaken for 1 min. They were subsequently centrifuged  
128 at 5000 rpm for 5 min. A 2-mL upper organic layer was taken and translocated to a d-SPE tube  
129 containing 600 mg MgSO<sub>4</sub>, 300 mg PSA and 100 mg alumina. The extract was shaken for 1 min and  
130 centrifuged. After centrifugation, 200 µL of upper layer was taken and placed into a vial for the  
131 analysis of pyrethroid residues using gas chromatography equipped with a micro electron capture  
132 detector (GC-µECD).

133 *Roasted coffee powder and coffee sludge:* 2.5 g fine roasted coffee powder and 2.5 g  
134 coffee sludge were added with 10 ml acetonitrile and shaken for 30 sec. Then 4 g of MgSO<sub>4</sub>,  
135 1 g of NaCl, 1 g of C<sub>6</sub>H<sub>9</sub>Na<sub>3</sub>O<sub>9</sub> and 0.5 g C<sub>6</sub>H<sub>5</sub>Na<sub>3</sub>O<sub>7</sub> were added and shaken for 30 sec.  
136 Samples were later centrifuged at 5000 rpm for 5 min. Two mL upper organic layer was taken  
137 and placed into d-SPE tube containing 600 mg magnesium sulfate anhydrous, 100 mg PSA and  
138 100 mg alumina then shaken for 1 min and centrifuged thereafter at 5000 rpm for 5 min. After  
139 centrifugation, 200 µL of upper layer of individual sample was taken and placed into a vial for  
140 GC-µECD analysis.

#### 141 **Heavy metals**

142 The acid digestion method was used to extract 9 metals: i.e., Cd, Co, Cr, Cu, Fe, Mn,  
143 Ni, Pb and Zn in all samples. Each metal concentration was determined using a flame atomic  
144 absorption spectrophotometer (FAAS). The digestion procedures of each sample type were as  
145 follows:

146 *Green coffee beans, roasted coffee powder and coffee sludge:* 0.5 g of individual sample  
147 were digested with 5 mL mixture of 70% HNO<sub>3</sub> : 70% HClO<sub>4</sub> (3:1 v/v) at 180°C for at least 3  
148 h. The digested solution was maintained under this condition until clear solution indicating  
149 complete digestion was observed. Each sample was filtered using No. 4 Whatman filter paper  
150 (Germany) and then adjusted to 25 mL using ultra-high purity water and kept at 4°C until

151 FAAS analysis.

152 *Brew coffee drink*: 25 mL of each sample was digested with 5 mL 70% HNO<sub>3</sub> at 180°C for  
153 at least 3 h. The digested samples were cooled to room temperature (25°C) and then filtered through  
154 No. 4 Whatman filter paper. The solution volume was adjusted to 25 mL using ultra-high purity  
155 water and kept at 4°C until FAAS analysis.

## 156 **Sample analysis**

### 157 **Gas chromatographic analysis**

158 Pyrethroid residues analyses were carried out using an Agilent gas chromatography  
159 (GC 7890B, Agilent Technologies, Germany) with a micro-electron capture detector ( $\mu$ -  
160 ECD). The system was equipped with a 30 m x 0.32 mm x 0.25  $\mu$ m fused silica capillary  
161 column (HP-5, Agilent Technologies, Germany). High purity (99.999%) helium and nitrogen  
162 were used as carrier gas and make up gas at a constant flow rate of 20 mL/min and 60  
163 mL/min, respectively. The GC oven was operated as follows: initial temperature at 150°C  
164 held for 1 min, followed by the ramp of 15°C/min to 255°C and then 20°C/min to 300°C and  
165 held for 5 min. The injector and detector temperatures were set at 260°C and 315°C,  
166 respectively. The total run time was 28 min per sample. One microliter of each sample was  
167 injected to the GC system under splitless mode. Pyrethroid concentrations were quantified  
168 using standard calibration curves. Each sample was analyzed in triplicates to ensure reliable  
169 results.

170 The linearity, percentage recovery, precision, limit of detection (LOD) and limit of  
171 quantification (LOQ) for pyrethroid insecticides were determined under the European  
172 Commission (SANCO/12571/2013) criteria. The linearity ( $r^2 > 0.998$ ) was validated for  
173 concentration range of 0.001 – 1.000  $\mu$ g/g. The percentage recovery was determined using  
174 spiked known pyrethroid insecticide concentrations into each sample matrix. It was  
175 calculated by comparing the ratio of each spiked sample concentration to the analyzed

176 concentration. The precision was obtained by spiking blank sample with each pyrethroid at 6  
177 concentrations across the work range and express the variation in terms of relative standard  
178 deviation (%RSD). The LOD and LOQ were determined by comparing the target signal to  
179 noise ratio in blank sample spiked with known pyrethroid concentrations. For the LOD and  
180 LOQ the minimum signal to noise ratio was 3 and 10, respectively. The analytical  
181 performances were provided in Table 2.

### 182 **Heavy metal analysis**

183 Nine heavy metal concentrations were determined using an air-acetylene FAAS  
184 (SpectrA 240B Agilent technologies, USA) equipped with deuterium background corrector.  
185 All metals were analyzed in an absorbance mode at the optimal wavelength for each metal as  
186 follows; Cd 228.8 nm, Co 240.7 nm, Cr 357.9 nm, Cu 324.8 nm, Fe 248.3 nm, Mn 279.5 nm,  
187 Ni 232.0 nm, Pb 217.0 nm, and Zn 213.9 nm. The individual metal concentration was  
188 calculated using its corresponding calibration curve.

189 The linearity ( $r^2 > 0.999$ ) of calibration curve was evaluated using 5 replicates of 6  
190 metal concentrations ranging from 0.05 – 2.00 µg/g for Cd, 0.05 – 5.00 µg/g for Co and Cu,  
191 0.10 – 10.00 µg/g for Cr, 0.05 – 4.50 µg/g for Fe, 0.25 – 4.00 µg/g for Mn, 0.50 – 10.00 µg/g  
192 for Ni, 0.50 – 20.00 µg/g for Pb, and 0.10 – 2.00 µg/g for Zn. The accuracy of metal analysis  
193 was assessed using known spiked blank samples and the precision was also assessed by  
194 analyzing %RSD. The LOD and LOQ of each metal were calculated using signal-to-noise  
195 ratio (S/N) of 3 and 10, respectively. The obtained values were presented in Table 2.

### 196 **Determination of processing factor**

197 The processing factor (PF) for each transformation step (roasting, brewing and sludge)  
198 was calculated as the ratio of pyrethroid insecticide or metal in processed samples (roasted  
199 coffee powder, brew coffee drink, coffee sludge) (µg/kg) to those in non-processed samples  
200 (green coffee bean) (µg/kg) using the following equation:



201 Processing factor (PF)

$$= \frac{\text{Level of pyrethroid insecticide or metal in processed sample } (\mu\text{g/kg})}{\text{Level of pyrethroid insecticide or metal in unprocessed sample } (\mu\text{g/kg})}$$

202 The PF of  $< 1$  (reduction factor) indicated that there was a sample reduction of  
203 pyrethroid insecticide or metal by the processing step, whereas PF  $> 1$  (concentration factor)  
204 indicated that there was no reduction in those toxic residues (16). In addition, the percentage  
205 reduction (% reduction) for individual processing step was calculated using the following  
206 equation:

207 
$$\% \text{ reduction} = (1 - \text{PF}) \times 100$$

### 208 **Human health risk assessment**

209 The estimate daily intake/EDI, health risk index/HRI (the ratio of calculated EDI to  
210 ADI or RfD) and target hazard quotients (THQs) were used to evaluate human health risk from  
211 insecticide- and metal-contaminated coffee drink. Risk determination was also calculated for  
212 the average consumption of brew coffee drink and at the 97.5<sup>th</sup> percentiles of coffee drinker  
213 (extreme consumer). These allowed more comprehensive evaluation of human health risk  
214 associated with the consumption of pyrethroid and metal residues in coffee drink. The  
215 calculation formulae of EDI, HRI and THQ were listed as follows:

216 
$$\text{EDI} = \frac{C \times W_F}{W_{AB}}$$

217 where C = pyrethroid or metal concentration in brew coffee sample ( $\mu\text{g/mL}$ );  $W_F$  =  
218 daily average consumption of eater only in Thailand (mL/person/day) (216.06 mL/person/day  
219 for normal and 330 mL/person/day for the 97.5<sup>th</sup> percentile) and  $W_{AB}$  = average body weight  
220 (70 kg for adults).

221 
$$\text{HRI} = \frac{\text{EDI}}{\text{ADI or RfD}}$$

222 where ADI = the acceptable daily intake, RfD = oral reference dose ( $\Sigma$  cypermethrin  
223 0.010 mg/kg bw/day,  $\Sigma$  cyfluthrin 0.004 mg/kg bw/day, Cd 0.001 mg/kg bw/day, Cr 0.003

224 mg/kg bw/day, Cu 0.500 mg/kg bw/day, Fe 0.800 mg/kg bw/day, Mn 0.140 mg/kg bw/day, Ni  
225 0.020 mg/kg bw/day, Pb 0.025 mg/kg bw/day, and Zn 0.300 mg/kg bw/day)

$$226 \quad \text{THQ} = \frac{E_F \times E_D \times F_{IR} \times C}{\text{RfD} \times W_{AB} \times T_A} \times 10^{-3}$$

227 where  $E_F$  = exposure frequency (365 day/year),  $E_D$  = exposure duration (70 years),  $F_{IR}$   
228 = food ingestion rate (mL/person/day) (216.06 mL/person/day for normal and 330  
229 mL/person/day for the 97.5<sup>th</sup> percentile), RfD = oral reference dose (mg/kg bw/day)  
230 ( $\Sigma$ cyfluthrin 0.004 mg/kg bw/day, Cd 0.001 mg/kg bw/day, Cr 0.003 mg/kg bw/day, Cu 0.500  
231 mg/kg bw/day, Fe 0.800 mg/kg bw/day, Mn 0.140 mg/kg bw/day, Ni 0.020 mg/kg bw/day, Pb  
232 0.025 mg/kg bw/day, and Zn 0.300 mg/kg bw/day) (17, 18),  $W_{AB}$  = average body weight (70  
233 kg for adults) and  $T_A$  = average exposure time (365 days/year x lifetime, assuming 70 years).

## 234 **Data analysis**

235 Statistical analysis was performed using R statistical software version 3.4.3 (2017-11-  
236 30). The one-way Analysis of Variance (ANOVA) was used to test significant differences ( $p$   
237  $< 0.05$ ) and similarities among insecticide residues found in coffee samples undergone different  
238 processes.

## 239 **Results and Discussion**

### 240 **Pyrethroid residues in coffee samples**

241 Residues of pyrethroid insecticides in green coffee beans, roasted coffee powder, brew  
242 coffee drink and coffee sludge are shown in Table 3. All studied pyrethroids were  
243 predominantly found in green coffee beans from various processes (dried, semi-washed, and  
244 washed) but not in brew coffee drink. The residues in green coffee beans differed significantly  
245 ( $p < 0.05$ ) among processing steps (Table 3). Cyfluthrin 2, 3, cypermethrin CisA, and  
246  $\Sigma$ cyfluthrin concentrations in dried processed coffee beans were the highest ( $p < 0.05$ ). In  
247 addition, concentrations of flumethrin and cypermethrin TransD found in semi-washed  
248 processed coffee beans were significantly the highest ( $p < 0.05$ ). Simple washing process was

249 proven to easily remove these residues (19). Pesticides and insecticides were removed from  
250 the outer and silver skins of the beans following washed and semi-washed processes (3).  
251 However, this residue removal may not always correlate to the water solubility of each residue  
252 compound. The peeling and refrigeration storage may also affect residue reduction (20).

253 Concentrations of all studied pyrethroids in brew coffee drink (Table 3) were lower  
254 than their corresponding limits of detection (Table 2). The roasting and brew coffee steps  
255 reduced pyrethroid levels in coffee drink. Decreases in the amount of pyrethroids were via  
256 molecular structure breakdown (21) and physico-chemical properties e.g., evaporation, co-  
257 distillation and thermal degradation which may vary with chemical nature of the individual  
258 compound (22). There were no statistical differences in pyrethroid concentrations ( $p > 0.05$ )  
259 among coffee bean processes in roasted coffee beans and brew coffee drinks.

260 Most pyrethroid residue levels and their detection percentages in coffee sludge samples  
261 were lower than those found in roasted coffee beans (Table 3). Cyfluthrin 1 concentration  
262 found in coffee sludge sample from semi-washed beans was the highest ( $0.16 \pm 0.02 \mu\text{g/g}$ ).  
263 However, all pyrethroid residue concentrations in coffee sludge did not significantly differ  
264 among coffee bean processes ( $p > 0.05$ ).

### 265 **Heavy metal residues in coffee samples**

266 Most of the studied 9 metals were found in green coffee beans, roasted coffee powder,  
267 brew coffee drink, and coffee sludge except for Cr in green coffee beans and Cd in brew coffee  
268 drink (only in semi-washed process samples) (Table 3). In addition, the lowest and the highest  
269 metal concentrations were in brew coffee drink and green coffee beans, respectively. The  
270 significant differences ( $p > 0.05$ ) of Cd and Fe were found among the brew coffee drink.

271 The highest trace and toxic metal concentrations in green coffee beans were Cu ( $42.56$   
272  $\pm 18.12 \mu\text{g/g}$ ) and Pb ( $20.71 \pm 2.52 \mu\text{g/g}$ ) from semi-washed process. Copper is an inactive  
273 ingredient of some pesticides used in coffee culture. Its highest concentration was found in

274 coffee bean sample from Ethiopia with the concentration approximately 4 times higher than  
275 those in previous reports (14, 15). Besides Cu, green coffee beans were contaminated with Pb  
276 at higher concentration than those reported in other studies (14, 15, 23). The metal  
277 concentration differences depend on cultivation areas characterized by different organoleptic  
278 features and chemical compositions, which could be used as a tool for characterization coffee  
279 variation (12, 24). The Pb residue can affect the neurological system resulting in central and  
280 peripheral nervous system damages. It can also interfere with vitamin D conversion and  
281 calcium homeostasis, inhibit hemoglobin synthesis, as well as be a potential carcinogen (25).  
282 While excess Cu level may alter the metabolic functions and cause Menkes and Wilson's  
283 disease (26). Organic fertilizers, organic manures and pesticides used in cultivation usually  
284 were sources of different metal contaminations (12). However, there was no regulation of each  
285 metal residue in green coffee beans.

286 No significant differences ( $p > 0.05$ ) of metal residue concentrations in roasted coffee  
287 powder existed among coffee bean processes (Table 3). This indicated that the roasting process  
288 affected the metal concentrations in coffee beans. Mn concentration ( $32.21 \pm 2.36 \mu\text{g/g}$ ) was  
289 the highest in washed process whereas Fe concentrations ( $32.67 \pm 2.33 \mu\text{g/g}$ ,  $32.07 \pm 2.75$   
290  $\mu\text{g/g}$ ) were the highest in dried and semi-washed processes in roasted powder samples,  
291 respectively. Similar Mn and Fe concentrations in roasted coffee beans were previously  
292 reported (27). Metal concentrations in roasted coffee powder were higher than those in green  
293 coffee beans. It is likely that high temperature (up to  $250^\circ\text{C}$ ) used in the roasting process  
294 affected chemical compositions as well as biological activities of the green coffee beans (27).  
295 Increased metal concentrations, thus, were apparent (15, 27, 28). Not only the coffee bean  
296 origins and qualities but also the coffee bean processes could alter concentrations of both trace  
297 and toxic metals. The Pb concentrations in roasted coffee beans found in this study were above  
298 the EU permitted limit ( $0.2 \text{ mg/kg}$ ) (29).

299 The statistical differences of heavy metal concentrations ( $p > 0.05$ ) among bean  
300 processes were found for Cd, Cu, Fe, Ni, and Pb in brew coffee drink. Most metals were  
301 detected except for Cd in semi-washed process. Concentrations of Mn ( $0.62 \pm 0.09 \mu\text{g/mL}$  in  
302 washed process) and Pb ( $0.28 \pm 0.02 \mu\text{g/mL}$  in dried process) were the highest among trace  
303 and toxic metals, respectively. The detected Mn concentrations were similar to the report of  
304 Nędzarek, Tórz (30) but slightly higher than those found in others. These differences were  
305 caused from a wide range of geographical areas in coffee culture (12, 24, 27).

306 There were no significant differences ( $p > 0.05$ ) of metal concentrations in coffee  
307 sludge among bean processes. The metal found at the highest concentration was Fe ( $39.72 \pm$   
308  $5.23 \mu\text{g/g}$ ) in dried process coffee sludge. Coffee sludge has currently been used by several  
309 means, e.g., organic fertilizer for agricultural crops including coffee, raw materials for  
310 bioethanol and biogas production (31). If metal concentrations are high like those found in this  
311 study, the transfer of toxic contaminants can be expected. Metal contaminated coffee sludge  
312 for such purposes should be of concern. The regulation of metal residues in coffee sludge  
313 should then be established.

#### 314 **Determination of processing factors**

315 The processing factor (PF) and percentage reduction (%) for individual pesticide and  
316 metal from each process were determined (Table 4). No significant difference ( $p > 0.05$ ) of PF  
317 was found among the bean processes. All PFs of pyrethroids from all coffee bean processes  
318 were less than 1. This indicated that coffee roasting and brewing decreased pyrethroid residues.  
319 The results are in agreement with other studies whose PFs were decreased following food  
320 processing (3, 16). The roasting process plays the most important role in pyrethroid  
321 reduction. However, the PF was not calculated for the pyrethroids not detected in samples. On  
322 the contrary, higher concentrations of most metals were observed after roasting indicated by  
323 PF greater than 1 (Table 4). The increased concentrations were likely from the evaporation of

324 water and/or combustible mass in the coffee grain which concentrate metals in the coffee beans  
325 (27). The brew coffee drinks showed the opposite processing factors ( $PF < 1$ ) with percentage  
326 reductions greater than 96%. This indicated that coffee brewing resulted in the reduction of all  
327 metal concentrations and were likely due to dilution effect as their weight reduction.

### 328 **Human health risk assessment**

329 Human health risks from pyrethroid insecticide and metal contamination in brew coffee  
330 drink were assessed by considering two consumptions scenario, i.e., normal consumption and  
331 extreme consumption approaches (97.5<sup>th</sup> percentile) of Thai population. The estimate daily  
332 intakes (EDIs) and their health risk indices (HRIs) were presented in Table 5. None of  
333 pyrethroid pesticides were detectable in brew coffee drinks whereas all metals were found but  
334 the concentrations were lower than reference ADIs or RfDs ( $HRI < 1$ ). The EDIs have shown  
335 that toxic metals (Cd, Cr, Ni and Pb) and pyrethroid insecticides (cyfluthrin, cypermethrin and  
336 flumethrin) contaminations in brew coffee drinks are safe for both normal and the 97.5<sup>th</sup>  
337 percentiles of Thai population. Concentration of Pb found in brew coffee drink (0.31  $\mu\text{g}/\text{mL}$ )  
338 was the highest among toxic metals. Its highest EDIs via normal consumption (216.06 mL/day)  
339 and the 97.5<sup>th</sup> percentile (330 mL/day) consumption for Thai coffee drinker (32) were 0.97  
340 mg/kg bw/day (washed process) and 1.48 mg/kg bw/day (washed process), respectively. In  
341 addition, all calculated HRIs which were less than 1 (Table 5) indicated that human  
342 consumption of all studied samples was relatively safe. Trace metals such as Co, Cu, Fe, Mn,  
343 Ni and Zn are cofactors of a large number of enzymes. Their trace but adequate amounts are  
344 essential for normal body functions (Cu 0.9 mg/day; Fe 8-18 mg/day; Mn 1.8-2.3 mg/day; Ni  
345 0.5 mg/day and Zn 8-11 mg/day) (33). The excess amount of these trace metals, however, could  
346 cause adverse human health effects. The estimated consumptions of these metals in brew  
347 coffee drink from this study were higher than normal human requirement but still safe for the  
348 consumption. A few studies showed no health risk effects of mineral intake following coffee

349 consumption similar to this study (14, 27, 34). The THQ values were calculated and used to  
350 assess for human health risk for long-time consumers (Table 6). In this study, the THQs of all  
351 investigated analytes were less than 1. The consumption of brew coffee drinks from all studied  
352 coffee bean samples, thus, are unlikely to pose adverse effects on human health.

### 353 **Conclusion**

354 Coffee is among the most popular beverages in all countries. Insecticides and metals  
355 introduced during coffee cultures could result in their contaminations in the coffee beans.  
356 These contaminants could be reduced during coffee bean processing including dried, semi-  
357 washed, and washed processes. In this study, 3 pyrethroid insecticides and 9 metals were  
358 determined in coffee samples, i.e., green coffee beans, roasted coffee powder, brew coffee  
359 drink, and coffee sludge. Coffee roasting and brewing could reduce the concentrations of both  
360 investigated pyrethroid insecticides and metals indicated by the PF values which were less than  
361 1. Based on the normal and the 97.5<sup>th</sup> percentile consumption of Thai population, it can be  
362 concluded that the consumption of brew coffee drink is unlikely to pose adverse effects on  
363 human health. Uses of coffee by-product (coffee sludge) as fertilizers or biogas raw materials  
364 should be of concerns since it may contain toxic contaminants.

### 365 **Conflict of interest**

366 The authors report that there is no conflict of interest in the authorship and publication of this  
367 article.

### 368 **Acknowledgements**

369 This research is supported in part by the Graduate Program Scholarship from the  
370 Graduate School, Kasetsart University.

### 371 **References**

372 1. Clifford MN. Chlorogenic acids and other cinnamates – nature, occurrence and dietary  
373 burden. *Journal of the Science of Food and Agriculture*. 1999;79(3):362-72.

- 374 2. Hillocks RJ, Phiri NA, Overfield D. Coffee pest and disease management options for  
375 smallholders in Malawi. *Crop Protection*. 1999;18(3):199-206.
- 376 3. Mekonen S, Ambelu A, Spanoghe P. Effect of household coffee processing on pesticide  
377 residues as a means of ensuring consumers' safety. *Journal of Agricultural and Food*  
378 *Chemistry*. 2015;63(38):8568-73.
- 379 4. Dias CM, Oliveira FA, Madureira FD, Silva G, Souza WR, Cardeal ZL. Multi-residue  
380 method for the analysis of pesticides in Arabica coffee using liquid chromatography/tandem  
381 mass spectrometry. *Food Additives & Contaminants: Part A*. 2013;30(7):1308-15.
- 382 5. Yang X, Wang J, Xu DC, Qiu JW, Ma Y, Cui J. Simultaneous determination of 69  
383 pesticide residues in coffee by gas chromatography–mass spectrometry. *Food Analytical*  
384 *Methods*. 2011;4(2):186-95.
- 385 6. Reis MRd, Fernandes FL, Lopes EA, Gorri JER, Alves FM. Chapter 26 - Pesticide  
386 Residues in Coffee Agroecosystems. In: Preedy VR, editor. *Coffee in Health and Disease*  
387 *Prevention*. San Diego: Academic Press; 2015. p. 235-44.
- 388 7. Khambay BPS. Pyrethroid Insecticides. *Pesticide Outlook*. 2002;13(2):49-54.
- 389 8. Zhang W. Global pesticide use: profile, trend, cost / benefit and more. 2018;8:1-27.
- 390 9. de Queiroz VT, Azevedo MM, da Silva Quadros IP, Costa AV, do Amaral AA, dos  
391 Santos GMADA, et al. Environmental risk assessment for sustainable pesticide use in coffee  
392 production. *Journal of Contaminant Hydrology*. 2018;219:18-27.
- 393 10. Saillenfait A-M, Ndiaye D, Sabaté J-P. Pyrethroids: exposure and health effects  
394 – an update. *International Journal of Hygiene and Environmental Health*. 2015;218(3):281-92.
- 395 11. Selmar D, Bytof G, Knopp S-E, Breitenstein B. Germination of coffee seeds  
396 and its significance for coffee quality. *Plant Biology*. 2006;8(2):260-4.



- 397 12. Ashu R, Chandravanshi BS. Concentration levels of metals in commercially  
398 available Ethiopian roasted coffee powders and their infusions. *Bulletin of the Chemical*  
399 *Society of Ethiopia*. 2011;25(1):11-24.
- 400 13. Stelmach E, Pawel P, Anna S-M. Evaluation of the bioaccessability of Ca, Fe,  
401 Mg and Mn in ground coffee infusions by in vitro gastrointestinal digestion. *Journal of the*  
402 *Brazilian Chemical Society*. 2014;25(11):1993-9.
- 403 14. Şemen S, Mercan S, Yayla M, Açikkol M. Elemental composition of green  
404 coffee and its contribution to dietary intake. *Food Chemistry*. 2017;215:92-100.
- 405 15. Van Cuong T, Hong Ling L, Kang Quan G, Jin S, Shu Jie S, Le Linh T, et al.  
406 Effect of roasting conditions on concentration in elements of Vietnam robusta coffee. *Acta*  
407 *Universitatis Cibiniensis Series E: Food Technology*. 2014;18.
- 408 16. Bonnechere A, Hanot V, Jolie R, Hendrickx M, Bragard C, Bedoret T, et al.  
409 Processing factors of several pesticides and degradation products in carrots by household and  
410 industrial processing. *Journal of Food Research*. 2012;1(3).
- 411 17. EPA. Integrated Risk Information System Available 2019 [Available from:  
412 [www.cfpub.epa.gov/iris](http://www.cfpub.epa.gov/iris)].
- 413 18. WHO. Evaluation of Joint FAO/WHO Expert Committee on Food Additives  
414 (JECFA) 2018 [Available from: [www.apps.who.int/food-additives-contaminants-jecfa-](http://www.apps.who.int/food-additives-contaminants-jecfa-database)  
415 [database](http://www.apps.who.int/food-additives-contaminants-jecfa-database)].
- 416 19. Ahmed A, Randhawa MA, Yusuf MJ, Khalid N. Effect of processing on  
417 pesticide residues in food crops - a review. *Journal of Agricultural Research*. 2011;49(3):379-  
418 90.
- 419 20. Cengiz MF, Certel M, Karakaş B, Göçmen H. Residue contents of captan and  
420 procymidone applied on tomatoes grown in greenhouses and their reduction by duration of a

- 421 pre-harvest interval and post-harvest culinary applications. *Food Chemistry*.  
422 2007;100(4):1611-9.
- 423 21. Bajwa U, Sandhu KS. Effect of handling and processing on pesticide residues  
424 in food- a review. *Journal of Food Science and Technology*. 2014;51(2):201-20.
- 425 22. Sharma J, Satya S, Kumar V, Tewary DK. Dissipation of pesticides during  
426 bread-making. *Chemical Health and Safety*. 2005;12(1):17-22.
- 427 23. Adler G, Nędzarek A, Tórz A. Concentrations of selected metals (Na, K, Ca,  
428 Mg, Fe, Cu, Zn, Al, Ni, Pb, Cd) in coffee *J. Slovenian Journal of Public Health*.  
429 2019;58(4):187-93.
- 430 24. Grembecka M, Malinowska E, Szefer P. Differentiation of market coffee and  
431 its infusions in view of their mineral composition. *Sci Total Environ*. 2007;383(1):59-69.
- 432 25. Liu P, Wang C-N, Song X-Y, Wu Y-N. Dietary intake of lead and cadmium by  
433 children and adults – Result calculated from dietary recall and available lead/cadmium level in  
434 food in comparison to result from food duplicate diet method. *International Journal of Hygiene  
435 and Environmental Health*. 2010;213(6):450-7.
- 436 26. Gaetke LM, Chow-Johnson HS, Chow CK. Copper: toxicological relevance and  
437 mechanisms. *Arch Toxicol*. 2014;88(11):1929-38.
- 438 27. Árvay J, Šnirc M, Hauptvogel M, Bilčíková J, Bobková A, Demková L, et al.  
439 Concentration of micro- and macro-Elements in green and roasted coffee: influence of roasting  
440 degree and risk assessment for the consumers. *Biol Trace Elem Res*. 2019;190(1):226-33.
- 441 28. Cruz R, Morais S, Casal S. Chapter 66 - Mineral Composition Variability of  
442 Coffees: A Result of Processing and Production. In: Preedy V, editor. *Processing and Impact  
443 on Active Components in Food*. San Diego: Academic Press; 2015. p. 549-58.
- 444 29. European Commission Regulation. Pesticide residues MRLs. In: Consumers  
445 DGfH, editor. 2012.

446 30. Nędzarek A, Tórz A, Karakiewicz B, Clark JS, Laszczyńska M, Kaleta A, et al.  
447 Concentrations of heavy metals (Mn, Co, Ni, Cr, Ag, Pb) in coffee. *Acta Biochim Pol.*  
448 2013;60(4):623-7.

449 31. McNutt J, He Q. Spent coffee grounds: A review on current utilization. *Journal*  
450 *of Industrial and Engineering Chemistry.* 2019;71:78-88.

451 32. National Bureau of Agricultural Commodity and Food Standards. Food  
452 consumption data of Thailand. Bangkok, Thailand: National Bureau of Agricultural  
453 Commodity and Food Standards; 2016.

454 33. Nogaim QA, Al-Dalali S, Al-Badany A, Farh M. Determination of some heavy  
455 metals in Yemeni green coffee. *Journal of Applied Chemistry.* 2014;2(4):13-8.

456 34. Onianwa PC, Adetola IG, Iwegbue CMA, Ojo MF, Tella OO. Trace heavy  
457 metals composition of some Nigerian beverages and food drinks. *Food Chemistry.*  
458 1999;66(3):275-9.

459

460 **Table 1** Description of three coffee bean processes.

| <b>Process</b>   | <b>Description</b>                                          |
|------------------|-------------------------------------------------------------|
| Dried (D)        | The rip beans were removed after sundrying coffee fruits.   |
| Semi-washed (SW) | The hybrid method combining washed and dried processes.     |
| Washed (W)       | The rip beans were removed after coffee fruit fermentation. |

461

462 **Table 2** Results of percentage recovery (% recovery), percentage relative standard deviation  
463 (% RSD), limits of detection (LODs) and quantification (LOQs) of pyrethroid insecticides and  
464 metals.

| <b>Pyrethroid insecticides/metals</b> | <b>% recovery</b> | <b>% RSD</b> | <b>LOD (<math>\mu\text{g/g}</math>)</b> | <b>LOQ (<math>\mu\text{g/g}</math>)</b> |
|---------------------------------------|-------------------|--------------|-----------------------------------------|-----------------------------------------|
| Cyfluthrin 1                          | 86.37             | 9.27         | 0.005                                   | 0.030                                   |
| Cyfluthrin 2                          | 98.62             | 11.25        | 0.004                                   | 0.017                                   |
| Cyfluthrin 3                          | 79.29             | 12.02        | 0.003                                   | 0.010                                   |
| Cyfluthrin 4                          | 102.65            | 12.30        | 0.005                                   | 0.017                                   |
| Flumethrin                            | 98.35             | 8.41         | 0.020                                   | 0.056                                   |
| Cypermethrin CisA                     | 97.95             | 11.47        | 0.003                                   | 0.021                                   |
| Cypermethrin CisB                     | 94.11             | 9.47         | 0.001                                   | 0.065                                   |
| Cypermethrin TransC                   | 88.87             | 11.78        | 0.005                                   | 0.019                                   |
| Cypermethrin TransD                   | 87.08             | 17.11        | 0.006                                   | 0.020                                   |
| Cd                                    | 99.71             | 2.94         | 0.0005                                  | 0.002                                   |
| Co                                    | 98.55             | 4.08         | 0.0003                                  | 0.001                                   |
| Cu                                    | 99.81             | 3.43         | 0.001                                   | 0.003                                   |
| Cr                                    | 98.04             | 3.91         | 0.0008                                  | 0.002                                   |
| Fe                                    | 98.52             | 3.54         | 0.002                                   | 0.005                                   |
| Mn                                    | 97.76             | 4.46         | 0.002                                   | 0.002                                   |
| Ni                                    | 98.77             | 5.22         | 0.0004                                  | 0.001                                   |
| Pb                                    | 99.51             | 2.16         | 0.002                                   | 0.005                                   |
| Zn                                    | 97.76             | 7.12         | 0.0008                                  | 0.002                                   |

465

466 **Table 3** Average  $\pm$  SE ( $\mu\text{g/g}$  or  $\mu\text{g/mL}$ ) and percentage detection (%) of pyrethroid insecticide and metal concentrations in coffee samples from  
 467 dried (D) , semi-washed (SW) washed (W) processes.

| Pyrethroid insecticides/metals | Average $\pm$ SE of pyrethroid insecticide and metal concentrations ( $\mu\text{g/g}$ or $\mu\text{g/mL}$ ) and percentage detection (in parenthesis) |                                           |                                          |                                          |                                           |                                          |                              |    |                              |                                          |                                          |                                            |
|--------------------------------|-------------------------------------------------------------------------------------------------------------------------------------------------------|-------------------------------------------|------------------------------------------|------------------------------------------|-------------------------------------------|------------------------------------------|------------------------------|----|------------------------------|------------------------------------------|------------------------------------------|--------------------------------------------|
|                                | Green coffee beans                                                                                                                                    |                                           |                                          | Roasted coffee powder                    |                                           |                                          | Brew coffee drink            |    |                              | Coffee sludge                            |                                          |                                            |
|                                | D                                                                                                                                                     | SW                                        | W                                        | D                                        | SW                                        | W                                        | D                            | SW | W                            | D                                        | SW                                       | W                                          |
| Cyfluthrin 1                   | 0.25 $\pm$ 0.16 <sup>a</sup><br>(66.67%)                                                                                                              | 0.11 $\pm$ 0.04 <sup>a</sup><br>(60.00%)  | 0.04 $\pm$ 0.01 <sup>a</sup><br>(50.00%) | 0.28 $\pm$ 0.07 <sup>b</sup><br>(26.67%) | 0.16 $\pm$ 0.02 <sup>ab</sup><br>(40.00%) | 0.02 $\pm$ 0.00 <sup>a</sup><br>(16.67%) | ND                           | ND | ND                           | 0.01 $\pm$ 0.00 <sup>a</sup><br>(26.67%) | 0.01 $\pm$ 0.00 <sup>a</sup><br>(40.00%) | 0.01 $\pm$ 0.00 <sup>a</sup><br>(20.00%)   |
| Cyfluthrin 2                   | 0.84 $\pm$ 0.25 <sup>b</sup><br>(100.00%)                                                                                                             | 0.13 $\pm$ 0.03 <sup>a</sup><br>(60.00%)  | 0.10 $\pm$ 0.02 <sup>a</sup><br>(90.00%) | ND                                       | ND                                        | ND                                       | ND                           | ND | ND                           | ND                                       | ND                                       | ND                                         |
| Cyfluthrin 3                   | 0.19 $\pm$ 0.04 <sup>b</sup><br>(60.00%)                                                                                                              | 0.04 $\pm$ 0.02 <sup>a</sup><br>(60.00%)  | 0.03 $\pm$ 0.01 <sup>a</sup><br>(20.00%) | ND                                       | ND                                        | ND                                       | ND                           | ND | ND                           | ND                                       | ND                                       | ND                                         |
| Cyfluthrin 4                   | 0.18 $\pm$ 0.04 <sup>a</sup><br>(86.67%)                                                                                                              | 0.09 $\pm$ 0.05 <sup>a</sup><br>(60.00%)  | 0.06 $\pm$ 0.02 <sup>a</sup><br>(33.33%) | ND                                       | ND                                        | ND                                       | ND                           | ND | ND                           | ND                                       | ND                                       | ND                                         |
| $\Sigma$ Cyfluthrin            | 1.28 $\pm$ 0.33 <sup>b</sup><br>(100.00%)                                                                                                             | 0.23 $\pm$ 0.11 <sup>a</sup><br>(100.00%) | 0.14 $\pm$ 0.03 <sup>a</sup><br>(93.33%) | 0.28 $\pm$ 0.07 <sup>b</sup><br>(26.67%) | 0.16 $\pm$ 0.02 <sup>ab</sup><br>(40.00%) | 0.02 $\pm$ 0.00 <sup>a</sup><br>(16.67%) | ND                           | ND | ND                           | 0.01 $\pm$ 0.00 <sup>a</sup><br>(26.67%) | 0.01 $\pm$ 0.00 <sup>a</sup><br>(40.00%) | 0.01 $\pm$ 0.00 <sup>a</sup><br>(20.00%)   |
| Flumethrin                     | 0.39 $\pm$ 0.06 <sup>a</sup><br>(100.00%)                                                                                                             | 0.75 $\pm$ 0.01 <sup>b</sup><br>(40.00%)  | 0.24 $\pm$ 0.04 <sup>a</sup><br>(80.00%) | 0.06 $\pm$ 0.00 <sup>a</sup><br>(6.67%)  | 0.06 $\pm$ 0.02 <sup>a</sup><br>(60.00%)  | 0.06 $\pm$ 0.03 <sup>a</sup><br>(53.33%) | ND                           | ND | ND                           | 0.03 $\pm$ 0.01 <sup>a</sup><br>(26.67%) | ND                                       | 0.02 $\pm$ 0.01 <sup>a</sup><br>(16.67%)   |
| Cypermethrin CisA              | 0.06 $\pm$ 0.01 <sup>b</sup><br>(60.00%)                                                                                                              | 0.01 $\pm$ 0.00 <sup>a</sup><br>(20.00%)  | 0.02 $\pm$ 0.00 <sup>a</sup><br>(6.67%)  | ND                                       | ND                                        | ND                                       | ND                           | ND | ND                           | ND                                       | ND                                       | ND                                         |
| Cypermethrin CisB              | 0.02 $\pm$ 0.01 <sup>a</sup><br>(33.33%)                                                                                                              | 0.02 $\pm$ 0.00 <sup>a</sup><br>(20.00%)  | 0.03 $\pm$ 0.01 <sup>a</sup><br>(66.67%) | 0.00 <sup>a</sup><br>(6.67%)             | 0.00 <sup>a</sup><br>(20.00%)             | 0.01 $\pm$ 0.00 <sup>a</sup><br>(43.33%) | ND                           | ND | ND                           | ND                                       | ND                                       | 0.001 $\pm$ 0.00 <sup>a</sup><br>(100.00%) |
| Cypermethrin TransC            | 0.01 $\pm$ 0.00 <sup>a</sup><br>(20.00%)                                                                                                              | 0.01 <sup>a</sup><br>(20.00%)             | 0.01 $\pm$ 0.00 <sup>a</sup><br>(53.33%) | ND                                       | ND                                        | ND                                       | ND                           | ND | ND                           | ND                                       | ND                                       | ND                                         |
| Cypermethrin TransD            | 0.09 $\pm$ 0.01 <sup>ab</sup><br>(93.33%)                                                                                                             | 0.11 $\pm$ 0.05 <sup>b</sup><br>(40.00%)  | 0.06 $\pm$ 0.01 <sup>a</sup><br>(83.33%) | ND                                       | 0.01 $\pm$ 0.00 <sup>a</sup><br>(60.00%)  | 0.01 $\pm$ 0.00 <sup>a</sup><br>(56.67%) | ND                           | ND | ND                           | ND                                       | 0.02 $\pm$ 0.00 <sup>a</sup><br>(20.00%) | 0.01 $\pm$ 0.00 <sup>a</sup><br>(20.00%)   |
| $\Sigma$ Cypermethrin          | 0.12 $\pm$ 0.02 <sup>a</sup><br>(100.00%)                                                                                                             | 0.09 $\pm$ 0.04 <sup>a</sup><br>(60.00%)  | 0.08 $\pm$ 0.01 <sup>a</sup><br>(93.33%) | 0.00 <sup>a</sup><br>(6.67%)             | 0.01 $\pm$ 0.00<br>(60.00%)               | 0.01 $\pm$ 0.00 <sup>a</sup><br>(33.33%) | ND                           | ND | ND                           | ND                                       | 0.01 $\pm$ 0.00 <sup>a</sup><br>(20.00%) | 0.01 $\pm$ 0.00 <sup>a</sup><br>(26.67%)   |
| Cd                             | 0.67 $\pm$ 0.04 <sup>ab</sup>                                                                                                                         | 0.64 $\pm$ 0.02 <sup>a</sup>              | 0.74 $\pm$ 0.02 <sup>b</sup>             | 0.50 $\pm$ 0.03 <sup>a</sup>             | 0.56 $\pm$ 0.01 <sup>a</sup>              | 0.56 $\pm$ 0.02 <sup>a</sup>             | 0.01 $\pm$ 0.00 <sup>b</sup> | ND | 0.01 $\pm$ 0.00 <sup>a</sup> | 0.87 $\pm$ 0.30 <sup>a</sup>             | 0.44 $\pm$ 0.04 <sup>a</sup>             | 0.48 $\pm$ 0.02 <sup>a</sup>               |

| Pyrethroid insecticides/metals | Average $\pm$ SE of pyrethroid insecticide and metal concentrations ( $\mu\text{g/g}$ or $\mu\text{g/mL}$ ) and percentage detection (in parenthesis) |                                             |                                            |                                            |                                             |                                            |                                            |                                            |                                           |                                            |                                            |                                            |
|--------------------------------|-------------------------------------------------------------------------------------------------------------------------------------------------------|---------------------------------------------|--------------------------------------------|--------------------------------------------|---------------------------------------------|--------------------------------------------|--------------------------------------------|--------------------------------------------|-------------------------------------------|--------------------------------------------|--------------------------------------------|--------------------------------------------|
|                                | Green coffee beans                                                                                                                                    |                                             |                                            | Roasted coffee powder                      |                                             |                                            | Brew coffee drink                          |                                            |                                           | Coffee sludge                              |                                            |                                            |
|                                | D                                                                                                                                                     | SW                                          | W                                          | D                                          | SW                                          | W                                          | D                                          | SW                                         | W                                         | D                                          | SW                                         | W                                          |
|                                | (100.00%)                                                                                                                                             | (100.00%)                                   | (100.00%)                                  | (100.00%)                                  | (100.00%)                                   | (100.00%)                                  | (100.00%)                                  |                                            | (50.00%)                                  | (100.00%)                                  | (100.00%)                                  | (100.00%)                                  |
| Co                             | 0.88 $\pm$ 0.10 <sup>a</sup><br>(73.33%)                                                                                                              | 1.32 $\pm$ 0.43 <sup>a</sup><br>(80.00%)    | 0.92 $\pm$ 0.11 <sup>a</sup><br>(96.67%)   | 1.87 $\pm$ 0.14 <sup>a</sup><br>(100.00%)  | 1.91 $\pm$ 0.28 <sup>a</sup><br>(100.00%)   | 1.89 $\pm$ 0.14 <sup>a</sup><br>(100.00%)  | 0.02 $\pm$ 0.01 <sup>a</sup><br>(80.00%)   | 0.01 $\pm$ 0.01 <sup>a</sup><br>(40.00%)   | 0.02 $\pm$ 0.00 <sup>a</sup><br>(80.00%)  | 1.35 $\pm$ 0.17 <sup>a</sup><br>(100.00%)  | 1.19 $\pm$ 0.16 <sup>a</sup><br>(100.00%)  | 1.45 $\pm$ 0.11 <sup>a</sup><br>(100.00%)  |
| Cu                             | 35.79 $\pm$ 16.66 <sup>a</sup><br>(100.00%)                                                                                                           | 42.56 $\pm$ 18.12 <sup>a</sup><br>(100.00%) | 22.00 $\pm$ 5.23 <sup>a</sup><br>(100.00%) | 12.65 $\pm$ 2.89 <sup>a</sup><br>(100.00%) | 12.41 $\pm$ 1.69 <sup>a</sup><br>(100.00%)  | 15.19 $\pm$ 1.60 <sup>a</sup><br>(100.00%) | 0.02 $\pm$ 0.00 <sup>b</sup><br>(100.00%)  | 0.02 $\pm$ 0.01 <sup>ab</sup><br>(100.00%) | 0.01 $\pm$ 0.00 <sup>a</sup><br>(100.00%) | 12.03 $\pm$ 1.73 <sup>a</sup><br>(100.00%) | 15.21 $\pm$ 3.00 <sup>a</sup><br>(100.00%) | 14.33 $\pm$ 1.54 <sup>a</sup><br>(100.00%) |
| Cr                             | ND                                                                                                                                                    | ND                                          | ND                                         | 0.13 $\pm$ 0.00 <sup>b</sup><br>(13.33%)   | 0.97 $\pm$ 0.19 <sup>a</sup><br>(80.00%)    | 0.55 $\pm$ 0.12 <sup>ab</sup><br>(40.00%)  | 0.03 $\pm$ 0.00 <sup>a</sup><br>(100.00%)  | 0.04 $\pm$ 0.00 <sup>a</sup><br>(100.00%)  | 0.03 $\pm$ 0.00 <sup>a</sup><br>(100.00%) | 0.20 $\pm$ 0.04 <sup>a</sup><br>(20.00%)   | 0.26 $\pm$ 0.06 <sup>a</sup><br>(100.00%)  | 0.37 $\pm$ 0.08 <sup>a</sup><br>(46.67%)   |
| Fe                             | 34.74 $\pm$ 3.78 <sup>a</sup><br>(100.00%)                                                                                                            | 27.76 $\pm$ 2.29 <sup>a</sup><br>(100.00%)  | 27.11 $\pm$ 0.98 <sup>a</sup><br>(100.00%) | 32.67 $\pm$ 2.33 <sup>b</sup><br>(100.00%) | 32.07 $\pm$ 2.75 <sup>ab</sup><br>(100.00%) | 27.07 $\pm$ 0.45 <sup>a</sup><br>(100.00%) | 0.15 $\pm$ 0.01 <sup>b</sup><br>(100.00%)  | 0.14 $\pm$ 0.02 <sup>b</sup><br>(100.00%)  | 0.11 $\pm$ 0.01 <sup>a</sup><br>(100.00%) | 39.72 $\pm$ 5.23 <sup>a</sup><br>(100.00%) | 34.97 $\pm$ 2.66 <sup>a</sup><br>(100.00%) | 28.78 $\pm$ 0.76 <sup>a</sup><br>(100.00%) |
| Mn                             | 20.40 $\pm$ 1.99 <sup>ab</sup><br>(100.00%)                                                                                                           | 19.61 $\pm$ 3.40 <sup>a</sup><br>(100.00%)  | 30.56 $\pm$ 2.39 <sup>b</sup><br>(100.00%) | 17.70 $\pm$ 1.65 <sup>a</sup><br>(100.00%) | 21.35 $\pm$ 4.13 <sup>ab</sup><br>(100.00%) | 31.21 $\pm$ 2.36 <sup>b</sup><br>(100.00%) | 0.34 $\pm$ 0.06 <sup>a</sup><br>(100.00%)  | 0.33 $\pm$ 0.04 <sup>a</sup><br>(100.00%)  | 0.62 $\pm$ 0.09 <sup>a</sup><br>(100.00%) | 19.09 $\pm$ 1.31 <sup>a</sup><br>(100.00%) | 20.11 $\pm$ 4.57 <sup>a</sup><br>(100.00%) | 27.45 $\pm$ 2.07 <sup>a</sup><br>(100.00%) |
| Ni                             | 7.67 $\pm$ 0.60 <sup>b</sup><br>(100.00%)                                                                                                             | 10.41 $\pm$ 0.60 <sup>a</sup><br>(100.00%)  | 9.70 $\pm$ 0.54 <sup>ab</sup><br>(100.00%) | 4.70 $\pm$ 0.38 <sup>a</sup><br>(100.00%)  | 4.28 $\pm$ 0.53 <sup>a</sup><br>(100.00%)   | 3.71 $\pm$ 0.23 <sup>a</sup><br>(96.67%)   | 0.07 $\pm$ 0.01 <sup>b</sup><br>(100.00%)  | 0.05 $\pm$ 0.02 <sup>ab</sup><br>(80.00%)  | 0.04 $\pm$ 0.01 <sup>a</sup><br>(83.33%)  | 4.26 $\pm$ 0.47 <sup>a</sup><br>(100.00%)  | 4.02 $\pm$ 0.97 <sup>a</sup><br>(100.00%)  | 3.73 $\pm$ 0.27 <sup>a</sup><br>(100.00%)  |
| Pb                             | 20.14 $\pm$ 2.16 <sup>a</sup><br>(100.00%)                                                                                                            | 20.71 $\pm$ 2.52 <sup>a</sup><br>(100.00%)  | 16.92 $\pm$ 0.75 <sup>a</sup><br>(100.00%) | 23.32 $\pm$ 0.90 <sup>a</sup><br>(100.00%) | 23.44 $\pm$ 0.98 <sup>a</sup><br>(100.00%)  | 21.19 $\pm$ 0.54 <sup>a</sup><br>(100.00%) | 0.28 $\pm$ 0.02 <sup>ab</sup><br>(100.00%) | 0.26 $\pm$ 0.02 <sup>a</sup><br>(100.00%)  | 0.31 $\pm$ 0.01 <sup>b</sup><br>(100.00%) | 18.02 $\pm$ 0.67 <sup>a</sup><br>(100.00%) | 18.02 $\pm$ 0.43 <sup>a</sup><br>(100.00%) | 17.16 $\pm$ 0.40 <sup>a</sup><br>(100.00%) |
| Zn                             | 20.84 $\pm$ 7.19 <sup>a</sup><br>(100.00%)                                                                                                            | 30.13 $\pm$ 11.61 <sup>a</sup><br>(100.00%) | 15.59 $\pm$ 3.46 <sup>a</sup><br>(100.00%) | 9.27 $\pm$ 1.65 <sup>a</sup><br>(100.00%)  | 7.66 $\pm$ 0.92 <sup>a</sup><br>(100.00%)   | 8.64 $\pm$ 0.96 <sup>a</sup><br>(100.00%)  | 0.07 $\pm$ 0.01 <sup>a</sup><br>(100.00%)  | 0.07 $\pm$ 0.01 <sup>a</sup><br>(100.00%)  | 0.08 $\pm$ 0.01 <sup>a</sup><br>(100.00%) | 8.50 $\pm$ 0.97 <sup>a</sup><br>(100.00%)  | 9.84 $\pm$ 1.75 <sup>a</sup><br>(100.00%)  | 7.49 $\pm$ 0.93 <sup>a</sup><br>(100.00%)  |

468 Means followed by different letters indicated significant ( $p < 0.05$ ) differences among coffee bean processes.

469 Nd : Non detectable (concentrations  $<$  LOD)

470

471

**Table 4.** Processing factor (PF) and percentage reduction (%) in coffee samples from dried, semi-washed and washed processes.

| Pyrethroid /<br>metals residues | Processing factor (PF) and percentage reduction (%) |                      |                   |                     |                      |                   |                    |                      |                    |
|---------------------------------|-----------------------------------------------------|----------------------|-------------------|---------------------|----------------------|-------------------|--------------------|----------------------|--------------------|
|                                 | Dried process                                       |                      |                   | Semi-washed process |                      |                   | Washed process     |                      |                    |
|                                 | Roasted<br>beans                                    | Brew coffee<br>drink | Coffee<br>sludge  | Roasted<br>beans    | Brew coffee<br>drink | Coffee<br>sludge  | Roasted<br>beans   | Brew coffee<br>drink | Coffee<br>sludge   |
| <b>Cyfluthrin 1</b>             | 0.56<br>(43.77%)                                    | NA                   | 0.01<br>(99.06%)  | 0.00<br>(100.00%)   | NA                   | 0.00<br>(100.00%) | 0.01<br>(99.19%)   | NA                   | 0.12<br>(88.08%)   |
| <b>Cyfluthrin 2</b>             | 0.00<br>(100.00%)                                   | NA                   | 0.00<br>(100.00%) | 0.00<br>(100.00%)   | NA                   | 0.00<br>(100.00%) | 0.00<br>(100.00%)  | NA                   | 0.00<br>(100.00%)  |
| <b>Cyfluthrin 3</b>             | 0.00<br>(100.00%)                                   | NA                   | 0.00<br>(100.00%) | 0.00<br>(100.00%)   | NA                   | 0.00<br>(100.00%) | 0.00<br>(100.00%)  | NA                   | 0.00<br>(100.00%)  |
| <b>Cyfluthrin 4</b>             | 0.00<br>(100.00%)                                   | NA                   | 0.00<br>(100.00%) | 0.00<br>(100.00%)   | NA                   | 0.00<br>(100.00%) | 0.00<br>(100.00%)  | NA                   | 0.00<br>(100.00%)  |
| <b>ΣCyfluthrin</b>              | 0.59<br>(40.83%)                                    | NA                   | 0.01<br>(99.81%)  | 0.28<br>(72.21%)    | NA                   | 0.01<br>(98.81%)  | 0.02<br>(98.44%)   | NA                   | 0.06<br>(94.50%)   |
| <b>Flumethrin</b>               | 0.02<br>(98.05%)                                    | NA                   | 0.04<br>(96.00%)  | 0.07<br>(93.16%)    | NA                   | 0.00<br>(100.00%) | 0.27<br>(73.26%)   | NA                   | 0.01<br>(99.14%)   |
| <b>Cypermethrin<br/>CisA</b>    | 0.00<br>(100.00%)                                   | NA                   | 0.00<br>(100.00%) | 0.00<br>(100.00%)   | NA                   | 0.00<br>(100.00%) | 0.00<br>(100.00%)  | NA                   | 0.00<br>(100.00%)  |
| <b>Cypermethrin<br/>CisB</b>    | 0.04<br>(95.64%)                                    | NA                   | 0.00<br>(100.00%) | 0.05<br>(94.66%)    | NA                   | 0.00<br>(100.00%) | 0.10<br>(89.62%)   | NA                   | 0.01<br>(98.68%)   |
| <b>Cypermethrin<br/>TransC</b>  | 0.00<br>(100.00%)                                   | NA                   | 0.00<br>(100.00%) | 0.00<br>(100.00%)   | NA                   | 0.00<br>(100.00%) | 0.00<br>(100.00%)  | NA                   | 0.00<br>(100.00%)  |
| <b>Cypermethrin<br/>TransD</b>  | 0.00<br>(100.00%)                                   | NA                   | 0.00<br>(100.00%) | 0.12<br>(88.39%)    | NA                   | 0.00<br>(100.00%) | 0.05<br>(95.14%)   | NA                   | 0.01<br>(98.76%)   |
| <b>ΣCypermethrin</b>            | 0.01<br>(99.85%)                                    | NA                   | 0.00<br>(100.00%) | 0.11<br>(89.27)     | NA                   | 0.00<br>(100.00%) | 0.97<br>(90.26%)   | NA                   | 0.05<br>(95.32%)   |
| <b>Cd</b>                       | 0.79<br>(21.54%)                                    | 0.01<br>(98.99%)     | 1.37<br>(-36.89%) | 0.88<br>(12.09%)    | NA                   | 0.69<br>(30.89%)  | 0.77<br>(22.77%)   | 0.00<br>(99.78%)     | 0.65<br>(35.26%)   |
| <b>Co</b>                       | 2.36<br>(-135.67)                                   | 0.02<br>(97.80%)     | 1.65<br>(-65.08%) | 2.21<br>(-121.42%)  | 0.01<br>(99.74%)     | 1.39<br>(-39.25%) | 4.57<br>(-356.99%) | 0.04<br>(96.230%)    | 3.32<br>(-232.00%) |

| Pyrethroid /<br>metals residues | Processing factor (PF) and percentage reduction (%) |                      |                   |                     |                      |                   |                   |                      |                   |
|---------------------------------|-----------------------------------------------------|----------------------|-------------------|---------------------|----------------------|-------------------|-------------------|----------------------|-------------------|
|                                 | Dried process                                       |                      |                   | Semi-washed process |                      |                   | Washed process    |                      |                   |
|                                 | Roasted<br>beans                                    | Brew coffee<br>drink | Coffee<br>sludge  | Roasted<br>beans    | Brew coffee<br>drink | Coffee<br>sludge  | Roasted<br>beans  | Brew coffee<br>drink | Coffee<br>sludge  |
| <b>Cr</b>                       | NA                                                  | NA                   | NA                | NA                  | NA                   | NA                | NA                | NA                   | NA                |
| <b>Cu</b>                       | 1.04<br>(-4.408%)                                   | 0.00<br>(99.79%)     | 1.08<br>(-7.76%)  | 0.68<br>(32.11%)    | 0.01<br>(99.92%)     | 1.21<br>(-20.92%) | 1.19<br>(-18.59%) | 0.01<br>(99.88%)     | 1.11<br>(-10.53%) |
| <b>Fe</b>                       | 1.03<br>(-3.27%)                                    | 0.01<br>(99.54%)     | 1.25<br>(-25.34%) | 1.16<br>(-16.20%)   | 0.01<br>(99.50%)     | 1.27<br>(-26.88%) | 1.02<br>(-2.16%)  | 0.01<br>(99.58%)     | 1.10<br>(-9.06%)  |
| <b>Mn</b>                       | 0.88<br>(11.69%)                                    | 0.02<br>(98.45%)     | 0.98<br>(2.16%)   | 1.11<br>(-10.85%)   | 0.02<br>(98.23%)     | 1.03<br>(-2.97%)  | 1.05<br>(-4.68)   | 0.02<br>(98.06%)     | 0.93<br>(7.07%)   |
| <b>Ni</b>                       | 0.97<br>(2.64%)                                     | 0.02<br>(98.24%)     | 0.86<br>(14.55%)  | 0.41<br>(59.29%)    | 0.01<br>(99.51%)     | 0.38<br>(61.56%)  | 0.39<br>(60.90%)  | 0.014<br>(99.60%)    | 0.41<br>(59.55%)  |
| <b>Pb</b>                       | 1.28<br>(-28.42%)                                   | 0.02<br>(98.42%)     | 1.00<br>(0.20%)   | 1.20<br>(-20.35%)   | 0.013<br>(98.67%)    | 0.91<br>(8.80%)   | 1.31<br>(-31.33%) | 0.029<br>(98.06%)    | 1.06<br>(-5.75%)  |
| <b>Zn</b>                       | 0.99<br>(1.43%)                                     | 0.01<br>(99.35%)     | 0.86<br>(13.88%)  | 0.50<br>(49.56%)    | 0.01<br>(99.48%)     | 0.77<br>(23.35%)  | 1.23<br>(-22.85%) | 0.01<br>(99.05%)     | 1.10<br>(-9.70%)  |

473 NA (not available): the processing factor was not calculated due to residue of pesticides or metals was not detected.



474 **Table 5.** Estimated normal dietary (EDI) of exposure levels to residues of pesticides ( $\mu\text{g}/\text{kg}$  bw/day) and metals ( $\mu\text{g}/\text{kg}$  bw/day) detected in brew  
 475 coffee drink and Health Risk Index (HRI) based on normal consumption and the 97<sup>th</sup> percentile consumption of Thai population.

| Pyrethroid /<br>metals residues | Normal consumption |      |                     |      |                |      | The 97.5 <sup>th</sup> percentile consumption |      |                     |      |                |      |
|---------------------------------|--------------------|------|---------------------|------|----------------|------|-----------------------------------------------|------|---------------------|------|----------------|------|
|                                 | Dried process      |      | Semi-washed process |      | Washed process |      | Dried process                                 |      | Semi-washed process |      | Washed process |      |
|                                 | EDI                | HRI  | EDI                 | HRI  | EDI            | HRI  | EDI                                           | HRI  | EDI                 | HRI  | EDI            | HRI  |
| <b>ΣCyfluthrin</b>              | ND                 | ND   | ND                  | ND   | ND             | ND   | ND                                            | ND   | ND                  | ND   | ND             | ND   |
| <b>ΣCypermethrin</b>            | ND                 | ND   | ND                  | ND   | ND             | ND   | ND                                            | ND   | ND                  | ND   | ND             | ND   |
| <b>Flumethrin</b>               | ND                 | ND   | ND                  | ND   | ND             | ND   | ND                                            | ND   | ND                  | ND   | ND             | ND   |
| <b>Cd</b>                       | 0.02               | 0.02 | ND                  | ND   | 0.01           | 0.00 | 0.03                                          | 0.03 | ND                  | ND   | 0.01           | 0.01 |
| <b>Co</b>                       | 0.06               | NA   | 0.04                | NA   | 0.05           | NA   | 0.09                                          | NA   | 0.06                | NA   | 0.08           | NA   |
| <b>Cr</b>                       | 0.08               | 0.03 | 0.11                | 0.04 | 0.09           | 0.03 | 0.12                                          | 0.04 | 0.17                | 0.06 | 0.13           | 0.04 |
| <b>Cu</b>                       | 0.07               | 0.00 | 0.05                | 0.00 | 0.05           | 0.00 | 0.10                                          | 0.00 | 0.08                | 0.00 | 0.07           | 0.00 |
| <b>Fe</b>                       | 0.45               | 0.00 | 0.43                | 0.00 | 0.34           | 0.00 | 0.69                                          | 0.00 | 0.66                | 0.00 | 0.52           | 0.00 |
| <b>Mn</b>                       | 1.04               | 0.01 | 1.02                | 0.01 | 1.91           | 0.01 | 1.58                                          | 0.01 | 1.56                | 0.01 | 2.91           | 0.02 |
| <b>Ni</b>                       | 0.22               | 0.01 | 0.17                | 0.01 | 0.12           | 0.01 | 0.34                                          | 0.02 | 0.25                | 0.01 | 0.18           | 0.01 |
| <b>Pb</b>                       | 0.87               | 0.04 | 0.79                | 0.03 | 0.97           | 0.04 | 1.33                                          | 0.05 | 1.21                | 0.05 | 1.48           | 0.06 |
| <b>Zn</b>                       | 0.22               | 0.00 | 0.22                | 0.00 | 0.24           | 0.00 | 0.34                                          | 0.00 | 0.33                | 0.00 | 0.36           | 0.00 |

476 NA : not available therefore the ADI was not calculated due to no reports on reference acceptable daily intake.

477 ND : Not detectable.

478 The reference acceptable daily intake: Σcypermethrin 0.010 mg/kg bw/day; Σcyfluthrin 0.004 mg/kg bw/day; Cd 0.001 mg/kg bw/day; Cr 0.003 mg/kg bw/day; Cu 0.500 mg/kg  
 479 bw/day; Fe 0.800 mg/kg bw/day; Mn 0.140 mg/kg bw/day; Ni 0.020 mg/kg bw/day; Pb 0.025 mg/kg bw/day and Zn 0.300 mg/kg bw/day) (17, 18);

480

481

482  
483

**Table 6.** Average target hazard quotient (THQ) with the consumption of brew coffee drink based on normal consumption and the 97<sup>th</sup> percentile consumption of Thai population.

| Pyrethroid /<br>metals residues | Target hazard quotient (THQ) |                     |                |                                               |                     |                |
|---------------------------------|------------------------------|---------------------|----------------|-----------------------------------------------|---------------------|----------------|
|                                 | Normal consumption           |                     |                | The 97.5 <sup>th</sup> percentile consumption |                     |                |
|                                 | Dried process                | Semi-washed process | Washed process | Dried process                                 | Semi-washed process | Washed process |
| <b>ΣCyfluthrin</b>              | ND                           | ND                  | ND             | ND                                            | ND                  | ND             |
| <b>ΣCypermethrin</b>            | ND                           | ND                  | ND             | ND                                            | ND                  | ND             |
| <b>Flumethrin</b>               | ND                           | ND                  | ND             | ND                                            | ND                  | ND             |
| <b>Cd</b>                       | 0.02                         | ND                  | 0.01           | 0.03                                          | ND                  | 0.01           |
| <b>Co</b>                       | NA                           | NA                  | NA             | NA                                            | NA                  | NA             |
| <b>Cr</b>                       | 0.03                         | 0.05                | 0.04           | 0.04                                          | 0.06                | 0.04           |
| <b>Cu</b>                       | <0.01                        | <0.01               | <0.01          | <0.01                                         | <0.01               | <0.01          |
| <b>Fe</b>                       | <0.01                        | <0.01               | <0.01          | 0.01                                          | 0.01                | 0.01           |
| <b>Mn</b>                       | 0.01                         | 0.01                | 0.02           | 0.01                                          | 0.01                | 0.02           |
| <b>Ni</b>                       | 0.01                         | 0.01                | 0.01           | 0.02                                          | 0.01                | 0.01           |
| <b>Pb</b>                       | 0.04                         | 0.04                | 0.05           | 0.05                                          | 0.05                | 0.06           |
| <b>Zn</b>                       | <0.01                        | <0.01               | <0.01          | 0.01                                          | 0.01                | 0.01           |

484  
485

NA : the THQ was not calculated due to no report on reference acceptable daily intake.  
ND : Not detectabl
